# Supplementary material for: Prediction of Acid Red 138 solubility in supercritical CO2 with water co-solvent
Source: Royal Society of Chemistry journal article supplement (doi:10.1039/c9ra06749c), 2019-01-01
Supplement: c9ra06749c1.pdf [file c9ra06749c1.pdf]

**Table S1** Ethylene glycol solubilities in supercritical CO<sub>2</sub> at 353.15 K<sup>a</sup>

| T<br>(K) | P<br>(MPa) | Ethylene glycol solubility ( $y_2$ , 10 <sup>-2</sup> mol/mol) |                           |
|----------|------------|----------------------------------------------------------------|---------------------------|
|          |            | Test data                                                      | Jiang's data <sup>b</sup> |
| 353.15   | 11         | 1.09                                                           | 1.2                       |
|          | 13         | 1.32                                                           | 1.46                      |
|          | 15         | 1.95                                                           | 1.90                      |
|          | 17         | 3.03                                                           | 3.16                      |
|          | 19         | 4.40                                                           | 4.29                      |

<sup>a</sup> Standard uncertainties  $u$  are  $u(T) = 0.1$  K and  $u(P) = 0.1$  MPa;  $u(y_2) = 0.02$  mol/mol with 0.95 level of confidence ( $k \approx 2$ ).

<sup>b</sup> Observed by Jiang et al..<sup>28</sup>

**Table S2** Solubilities of water in supercritical CO<sub>2</sub><sup>a</sup>

| T<br>(K) | P<br>(MPa) | SC-CO <sub>2</sub> Density <sup>b</sup><br>(kg/m <sup>3</sup> ) | Water                                                  |                        |
|----------|------------|-----------------------------------------------------------------|--------------------------------------------------------|------------------------|
|          |            |                                                                 | Solubility (y <sub>2</sub> , 10 <sup>-3</sup> mol/mol) | Concentration (S, g/l) |
| 353.15   | 20         | 593.89                                                          | 17.52                                                  | 4.39                   |
|          | 22         | 636.74                                                          | 17.76                                                  | 4.65                   |
|          | 24         | 671.27                                                          | 18.74                                                  | 5.24                   |
|          | 26         | 699.95                                                          | 19.69                                                  | 5.64                   |
| 363.15   | 20         | 533.17                                                          | 19.28                                                  | 4.40                   |
|          | 22         | 580.38                                                          | 20.19                                                  | 4.67                   |
|          | 24         | 619.21                                                          | 21.01                                                  | 5.68                   |
|          | 26         | 651.66                                                          | 21.93                                                  | 5.72                   |
| 373.15   | 20         | 480.53                                                          | 24.07                                                  | 4.85                   |
|          | 22         | 528.94                                                          | 24.83                                                  | 5.59                   |
|          | 24         | 570.19                                                          | 25.20                                                  | 5.94                   |
|          | 26         | 605.34                                                          | 27.20                                                  | 6.92                   |
| 393.15   | 20         | 401.15                                                          | 31.56                                                  | 5.35                   |
|          | 22         | 445.86                                                          | 34.55                                                  | 6.53                   |
|          | 24         | 486.70                                                          | 35.06                                                  | 7.23                   |
|          | 26         | 523.39                                                          | 35.78                                                  | 7.95                   |
| 413.15   | 20         | 347.58                                                          | 44.01                                                  | 6.76                   |
|          | 22         | 386.61                                                          | 45.38                                                  | 7.28                   |
|          | 24         | 423.72                                                          | 47.20                                                  | 8.21                   |
|          | 26         | 458.44                                                          | 50.43                                                  | 9.96                   |

<sup>a</sup> Standard uncertainties *u* are *u*(T) = 0.1 K, *u*(P) = 0.1 MPa and *u*( $\rho$ ) = 0.1 kg/m<sup>3</sup>; *u*(y<sub>2</sub>) = 0.02 mol/mol and *u*(S) = 0.02 g/l with 0.95 level of confidence (*k*≈2).

<sup>b</sup> The density of supercritical CO<sub>2</sub> is obtained from the NIST fluid property database.<sup>29</sup>

**Table S3** Solubilities of Acid Red 138 in supercritical CO<sub>2</sub> saturated with water<sup>a</sup>

| T<br>(K) | P<br>(MPa) | SC-CO <sub>2</sub><br>Density <sup>b</sup><br>(kg/m <sup>3</sup> ) | Dyes in SC-CO <sub>2</sub>                                |                                            | Dyes in liquid phase              |                                    |
|----------|------------|--------------------------------------------------------------------|-----------------------------------------------------------|--------------------------------------------|-----------------------------------|------------------------------------|
|          |            |                                                                    | Solubility<br>(y <sub>2</sub> , 10 <sup>-6</sup> mol/mol) | Concentration<br>(S, 10 <sup>-3</sup> g/l) | Dyes<br>(S, 10 <sup>-3</sup> g/l) | Water<br>(S, 10 <sup>-1</sup> g/l) |
| 353.15   | 20         | 593.89                                                             | 4.77                                                      | 4.32                                       | 1.91                              | 1.12                               |
|          | 22         | 636.74                                                             | 5.01                                                      | 4.86                                       | 1.90                              | 1.07                               |
|          | 24         | 671.27                                                             | 5.70                                                      | 5.83                                       | 1.88                              | 0.95                               |
|          | 26         | 699.95                                                             | 6.21                                                      | 6.63                                       | 1.87                              | 0.87                               |
| 363.15   | 20         | 533.17                                                             | 5.53                                                      | 4.50                                       | 1.91                              | 1.12                               |
|          | 22         | 580.38                                                             | 5.81                                                      | 5.14                                       | 1.89                              | 1.01                               |
|          | 24         | 619.21                                                             | 6.22                                                      | 5.87                                       | 1.88                              | 0.86                               |
| 373.15   | 20         | 480.53                                                             | 6.87                                                      | 6.83                                       | 1.86                              | 0.85                               |
|          | 22         | 480.53                                                             | 7.26                                                      | 5.32                                       | 1.89                              | 1.03                               |
|          | 24         | 528.94                                                             | 7.64                                                      | 6.16                                       | 1.88                              | 0.88                               |
| 393.15   | 20         | 570.19                                                             | 8.11                                                      | 7.05                                       | 1.86                              | 0.81                               |
|          | 22         | 605.34                                                             | 8.81                                                      | 8.13                                       | 1.84                              | 0.61                               |
|          | 24         | 605.34                                                             | 8.81                                                      | 8.13                                       | 1.84                              | 0.61                               |
| 413.15   | 20         | 401.15                                                             | 10.63                                                     | 6.50                                       | 1.87                              | 0.93                               |
|          | 22         | 445.86                                                             | 10.65                                                     | 7.24                                       | 1.86                              | 0.69                               |
|          | 24         | 486.70                                                             | 10.86                                                     | 8.06                                       | 1.84                              | 0.55                               |
|          | 26         | 523.39                                                             | 11.04                                                     | 8.81                                       | 1.83                              | 0.41                               |
| 413.15   | 20         | 347.58                                                             | 13.30                                                     | 7.05                                       | 1.86                              | 0.65                               |
|          | 22         | 386.61                                                             | 13.96                                                     | 8.23                                       | 1.84                              | 0.54                               |
|          | 24         | 423.72                                                             | 14.05                                                     | 9.08                                       | 1.82                              | 0.36                               |
|          | 26         | 458.44                                                             | 14.09                                                     | 9.85                                       | 1.80                              | 0.008                              |

<sup>a</sup> Standard uncertainties  $u$  are  $u(T) = 0.1$  K,  $u(P) = 0.1$  MPa and  $u(\rho) = 0.1$  kg/m<sup>3</sup>;  $u(y_2) = 0.02$  mol/mol and  $u(S) = 0.02$  g/l with 0.95 level of confidence ( $k \approx 2$ ).

<sup>b</sup> The density of supercritical CO<sub>2</sub> is obtained from the NIST fluid property database.<sup>29</sup>
